# Supplementary material for: Effect of Biochar on Labile Organic Carbon Fractions and Soil Carbon Pool Management Index
Source: MDPI journal article supplement (doi:10.3390/agronomy13051385), 2023-05-17

**Table S1.** The main and interactive effects of biochar application rate and time on soil organic carbon (SOC), soil labile organic carbon components, carbon pool activity (A) and carbon pool management index (CPMI) based on two-way ANOVAs ( $P < 0.05$ )

|         | Biochar application<br>rate | Time        | Biochar application<br>rate $\times$ Time |
|---------|-----------------------------|-------------|-------------------------------------------|
| SOC     | $P < 0.001$                 | $P = 0.004$ | $P = 0.068$                               |
| DOC/SOC | $P = 0.422$                 | $P < 0.001$ | $P = 0.360$                               |
| MBC/SOC | $P = 0.495$                 | $P < 0.001$ | $P = 0.312$                               |
| ROC/SOC | $P < 0.001$                 | $P = 0.001$ | $P = 0.047$                               |
| A       | $P < 0.001$                 | $P = 0.003$ | $P = 0.037$                               |
| CPMI    | $P = 0.025$                 | $P < 0.001$ | $P < 0.001$                               |

Note: DOC/SOC, the ratio of DOC to SOC; MBC/SOC, the ratio of MBC to SOC; ROC/SOC, the ratio of ROC to SOC.

**Table S2.** Effects of biochar applications on soil physiochemical properties

|           | Treatments | TN<br>(g·kg <sup>-1</sup> ) | AN<br>(mg·kg <sup>-1</sup> ) | Olsen-P<br>(mg·kg <sup>-1</sup> ) | pH          | SM<br>(%)    |
|-----------|------------|-----------------------------|------------------------------|-----------------------------------|-------------|--------------|
| 8 months  | Control    | 0.91±0.06Ba                 | 70.82±5.66Bb                 | 16.60±0.53Bb                      | 7.76±0.12Ba | 9.90±0.23Ba  |
|           | LB         | 0.89±0.04Ca                 | 68.13±2.05Cb                 | 11.67±0.38Bc                      | 7.68±0.03Ca | 9.40±0.41Bab |
|           | MB         | 1.02±0.12Ba                 | 74.55±5.63Bb                 | 17.70±0.20Bb                      | 7.67±0.03Ca | 9.06±0.21Bbc |
|           | HB         | 1.02±0.14Ba                 | 85.77±3.96Ca                 | 28.27±2.68Ba                      | 7.62±0.08Ca | 8.53±0.76Bc  |
| 12 months | Control    | 1.04±0.05Ac                 | 59.85±2.19Cc                 | 9.93±0.75Cbc                      | 7.83±0.08Ba | 17.43±1.66Aa |
|           | LB         | 1.24±0.05Ab                 | 82.83±9.06Bb                 | 8.50±0.90Bc                       | 7.88±0.04Ba | 17.62±0.61Aa |
|           | MB         | 1.38±0.12Ab                 | 86.80±4.71Bb                 | 12.83±0.85Bb                      | 7.89±0.04Ba | 17.44±1.22Aa |
|           | HB         | 1.54±0.12Aa                 | 104.18±3.74Ba                | 16.80±0.92Ca                      | 7.85±0.04Ba | 18.93±1.40Aa |
| 24months  | Control    | 1.10±0.03Ac                 | 95.40±3.19Ac                 | 21.90±2.00Ab                      | 8.17±0.01Aa | 17.71±1.87Aa |
|           | LB         | 1.13±0.05Bc                 | 99.65±7.57Ac                 | 20.03±6.34Ab                      | 8.17±0.02Aa | 17.66±0.92Aa |
|           | MB         | 1.24±0.05Ab                 | 121.61±9.25Ab                | 27.37±4.31Aab                     | 8.08±0.01Ab | 18.71±1.03Aa |
|           | HB         | 1.35±0.05Aa                 | 135.54±7.24Aa                | 35.20±3.10Aa                      | 8.02±0.02Ac | 19.54±1.03Aa |

Note: TN, total nitrogen; AN, c available nitrogen; Olsen-P, available phosphorus; SM, Soil moisture. Different uppercase letters indicate significant differences of the same treatments between different time ( $P<0.05$ ); Different lowercase letters in the same column indicate significant differences between treatments ( $P<0.05$ ).

Figure S1 Change of the relative abundance of bacterial community under different biochar application on time scales.

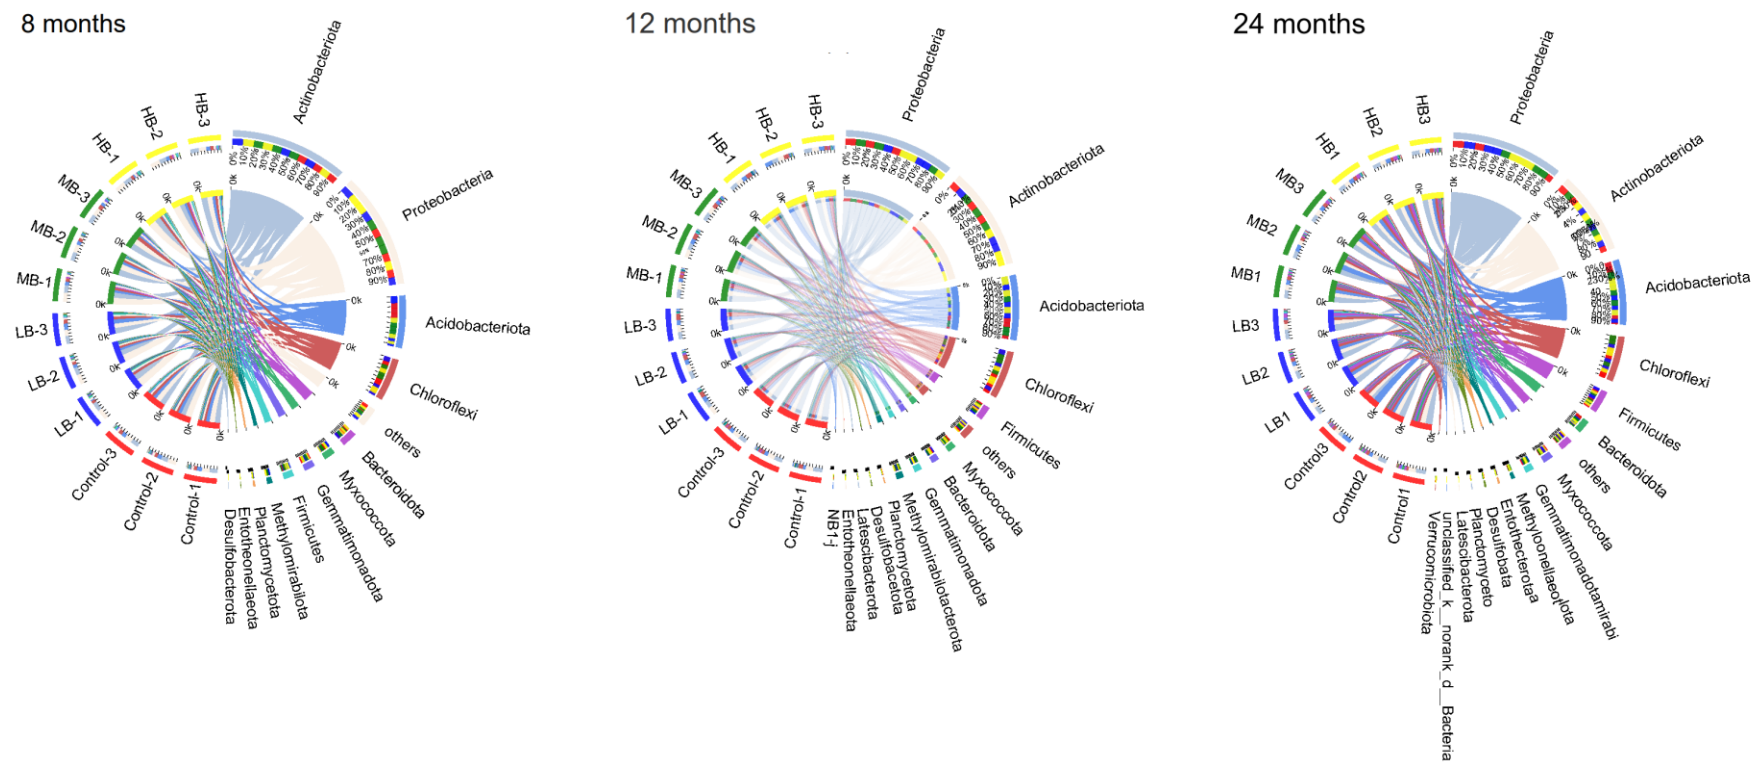

Supplement: s1 [file s1]
